# Supplementary material
Source: Springer Nature journal article supplement (https://www.springermedizin.de/resource/supplementary/12943_2010_781_MOESM12_ESM.pdf/9554810)

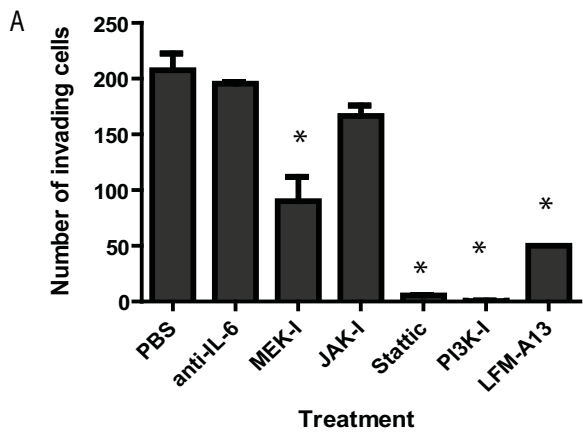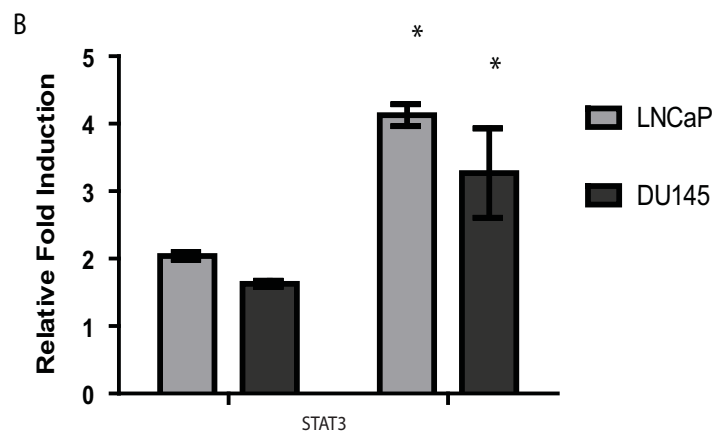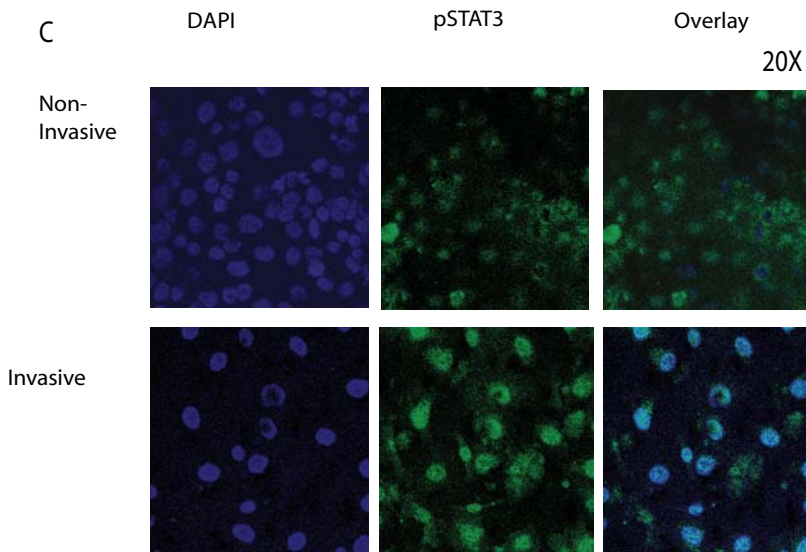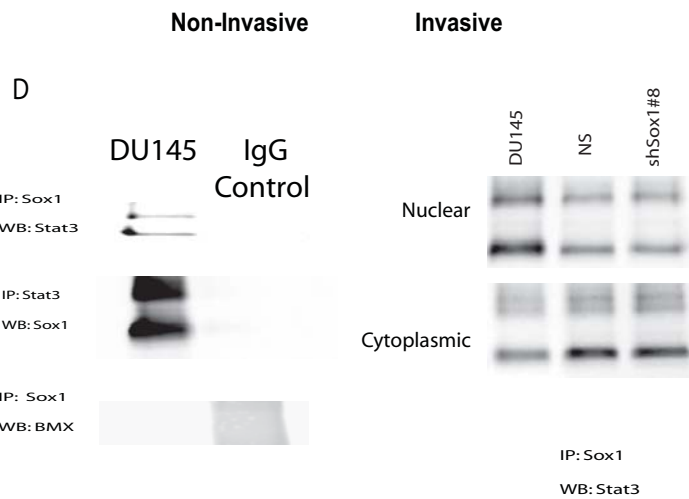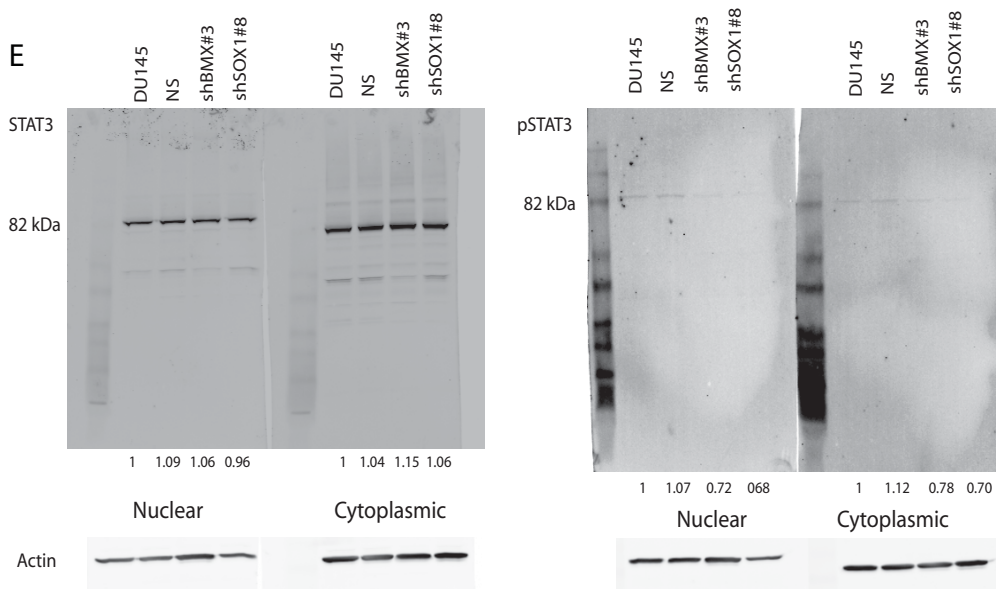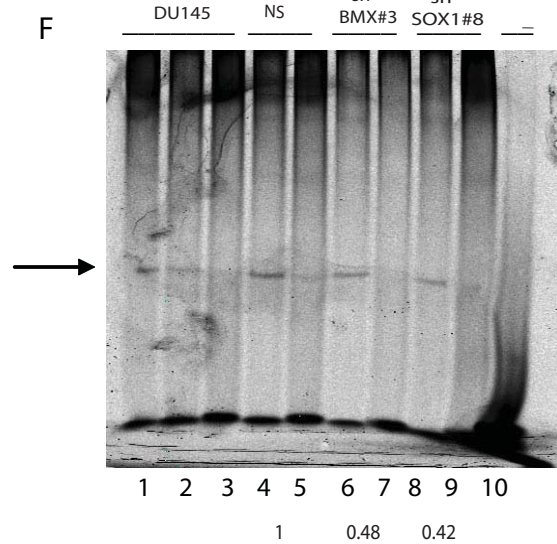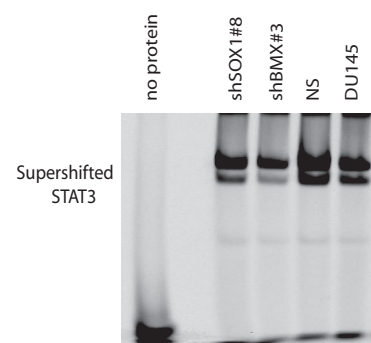

Supplement: MOESM12 [file 9554810]
